# Supplementary material for: Structure and magnetic properties of highly oriented LaBaCo2O5+δ films deposited on Si wafers with Pt/Ti buffer layer
Source: Royal Society of Chemistry journal article supplement (doi:10.1039/c9cp04484a), 2019-01-01
Supplement: c9cp04484a1.pdf [file c9cp04484a1.pdf]

## Supporting Information

### Structure and magnetic properties of highly oriented $\text{LaBaCo}_2\text{O}_{5+\delta}$ films deposited on Si wafers with Pt/Ti buffer layer

Jamal Shaibo<sup>a</sup>, Rui Yang<sup>a\*</sup>, Zhe Wang<sup>a</sup>, He-Ming Huang<sup>a</sup>, Hui-Kai He<sup>a</sup>, Qing-Yu Zhang<sup>b</sup> and Xin Guo<sup>a\*</sup>

<sup>a</sup>*State Key Laboratory of Material Processing and Die & Mould Technology, Laboratory of Solid State Ionics, School of Materials Science and Engineering, Huazhong University of science and technology, Wuhan 430074, P. R. China*

<sup>b</sup>*State Key Laboratory of Materials Modification by Laser, Ion and Electron Beams, School of Physics and Opto-electronic Technology, Dalian University of Technology, Dalian 116024, China*

E-mail: yangrui@hust.edu.cn; xguo@hust.edu.cn

Tel: +86-27-87559804; Fax: +86-27-87559804

X-ray diffraction (XRD) pattern of the target is presented in Fig. S1, in which the sharp diffraction peaks demonstrate that the LBCO target is highly crystallized with a single phase. The result also reveals the possibility of realizing cationic disordered phase, which can be confirmed from the single peak of (200) LBCO (inset of Fig. S1).

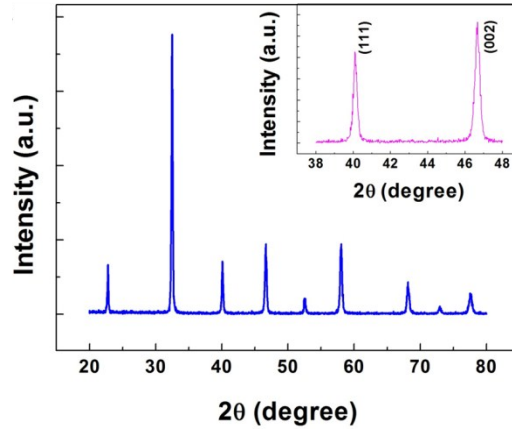

Figure S1. XRD pattern of LaBaCo<sub>2</sub>O<sub>5+δ</sub> (LBCO) target. The inset shows the zoom-in of the area with the (002) peak.

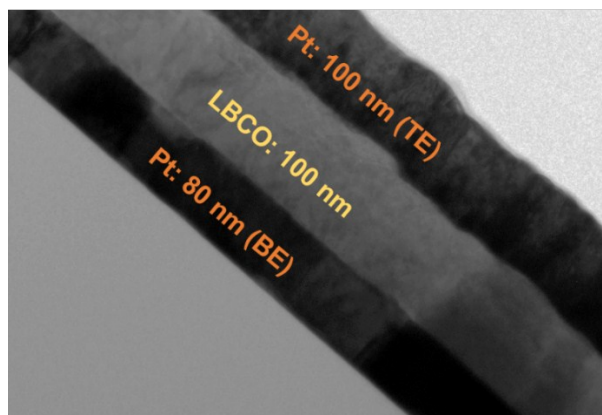

Figure S2. TEM image of the cross-section of the LBCO thin film sample. 100 nm-thick LBCO film is successfully integrated with 80 nm-thick Pt bottom electrode and 100 nm-thick Pt top contact.

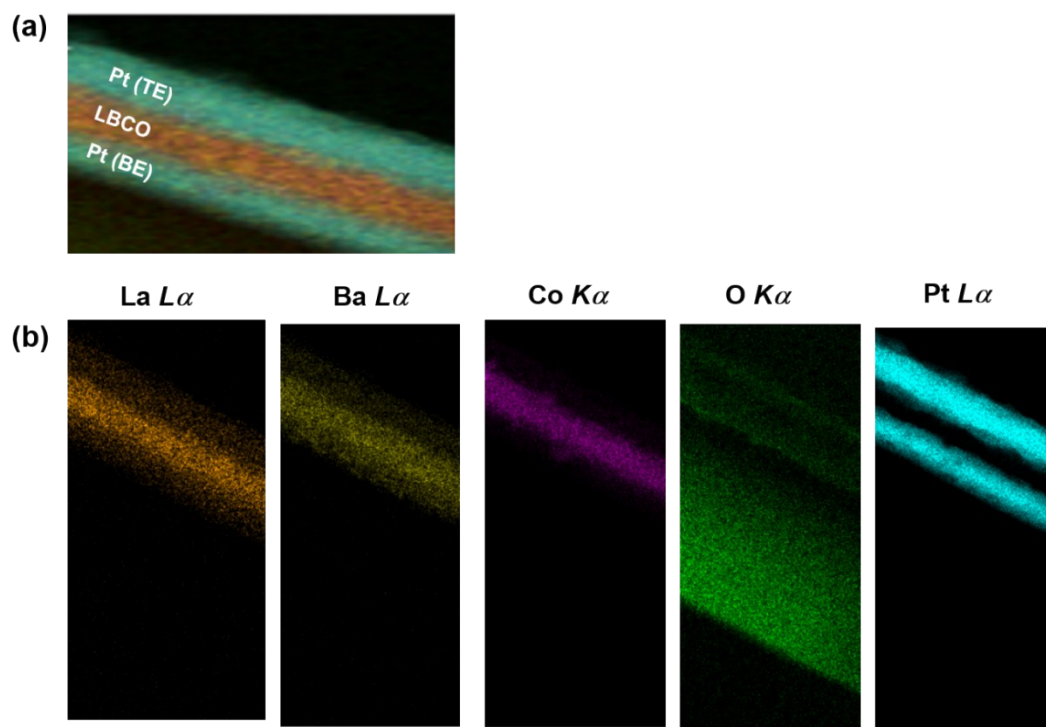

Figure S3. EDS elemental mapping of the LBCO film.

**Calculation of crystallite size, lattice constant and microstrain:**

The crystallite size and microstrain can be determined by the following equations:<sup>1-3</sup>

$$D_{hkl} = K\lambda / B_{1/2} \cos \theta ,$$

$$\varepsilon = B_{1/2} / 4 \tan \theta ,$$

where  $D_{hkl}$  is the crystallite size along the direction perpendicular to the film surface,  $K = 0.94$  is the Scherrer constant,  $B_{1/2}$  is the full width at half maximum (FWHM), and  $\lambda = 0.15418$  nm is the wavelength of  $K\alpha$  radiation of Cu. The results are presented in Table SI below.

Table SI. Crystallite sizes ( $D_{hkl}$ ), lattice parameters ( $C$ ) and microstrain of LBCO films

| Sample   | Theta (deg) | FWHM (deg) | $D_{hkl}$ (nm) | $C$ (nm) | Strain (%) |
|----------|-------------|------------|----------------|----------|------------|
| As grown | 22.93       | 0.50       | 16.9           | 0.395    | 1.64       |
| Annealed | 23.12       | 0.38       | 22.3           | 0.390    | 0.36       |
| Control  | 23.36       | 0.26       | 37.2           | 0.389    | 0.10       |

### Calculation of the composition ratio using XPS analysis:

Using standard peaks (from the reference book for fitting Co 2p),<sup>4</sup> the peak position of both as-prepared and annealed samples are deduced from the Gaussian-Lorentz calculation, and summarized in Table SII.

**Table SII.** Binding energy of Co 2p obtained from Figure 3 (herein MP, SP and FWHM refer to the main peak, satellite peak and full width at half maximum, respectively)

| Samples     | Spin-orbit             | Species          | Binding Energy (eV) | Area     | FWHM (eV) | Atomic conc. of oxygen (%) |
|-------------|------------------------|------------------|---------------------|----------|-----------|----------------------------|
| Annealed    | 2p <sub>3/2</sub> (MP) | Co <sup>3+</sup> | 778.12              | 1437.20  | 1.42      | 35.42                      |
|             |                        | Co <sup>4+</sup> | 780.25              | 6471.56  | 1.94      |                            |
|             | 2p <sub>1/2</sub> (MP) | Co <sup>3+</sup> | 793.38              | 795.63   | 1.32      |                            |
|             |                        | Co <sup>4+</sup> | 795.6               | 4070.41  | 1.93      |                            |
| As-prepared | 2p <sub>3/2</sub> (MP) | Co <sup>3+</sup> | 777.95              | 1472.43  | 0.999     | 34.79                      |
|             |                        | Co <sup>4+</sup> | 780.19              | 14211.22 | 2.15      |                            |
|             | 2p <sub>3/2</sub> (SP) | Co <sup>2+</sup> | 789.4               | 5354.68  | 2.98      |                            |
|             | 2p <sub>1/2</sub> (MP) | Co <sup>3+</sup> | 793.2               | 1097.73  | 0.84      |                            |
|             |                        | Co <sup>4+</sup> | 795.47              | 8886.36  | 2.18      |                            |
|             | 2p <sub>1/2</sub> (SP) | Co <sup>2+</sup> | 803.56              | 3132.74  | 5.13      |                            |

We deduce that the average ratio is 1:6 and 1:9 for the as-grown and annealed LBCO films, respectively, which is akin to the higher oxygen content in the annealed sample.

## References

1. K. Mallick and P. S. A. Kumar, *Journal of Applied Physics*, 2018, **124**, 053901.
2. A. Goktas, A. Tumbul, Z. Aba and M. Durgun, *Thin Solid Films*, 2019, **680**, 20-30.
3. A. Goktas, A. Tumbul and F. Aslan, *Journal of Sol-Gel Science and Technology*, 2016, **78**, 262-269.
4. J. F. Moulder, *Physical electronics*, 1995, 230-232.
